# Supplementary material for: Efficient energy storage in mustard husk derived porous spherical carbon nanostructures
Source: Royal Society of Chemistry journal article supplement (doi:10.1039/d1ma00679g), 2021-01-01
Supplement: d1ma00679g1.pdf [file d1ma00679g1.pdf]

## Electronic Supporting Information (ESI)

### Efficient energy storage in mustard husk derived porous spherical carbon nanostructures

Atin Pramanik,<sup>\*a,b</sup> Shreyasi Chattopadhyay,<sup>a,b</sup> Goutam De<sup>\*a,c</sup> and Sourindra Mahanty<sup>\*a</sup>

<sup>a</sup> CSIR-Central Glass & Ceramic Research Institute, 196 Raja S. C. Mullick Road, Kolkata 700032, India

<sup>b</sup> School of Chemistry, University of St Andrews, Purdie Building, North Haugh, St Andrews, Fife KY16 9ST, Scotland, United Kingdom (present address)

<sup>c</sup> S. N. Bose National Centre for Basic Sciences, Kolkata 7000106, India.

#### Corresponding Authors:

**Email:** mahanty@cgcric.res.in (S. Mahanty); ap294@st-andrews.ac.uk (A. Pramanik); g.de@bose.res.in (G. De)

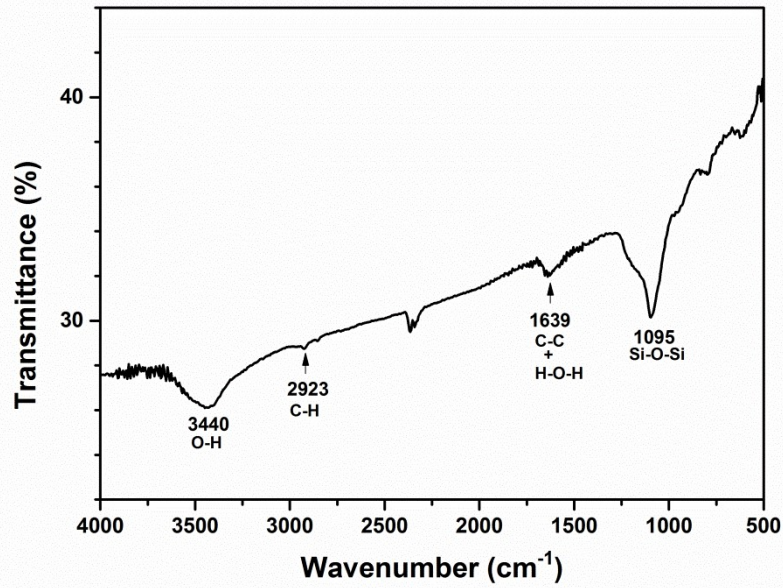

Fig. S1 FTIR spectrum of PSCN.

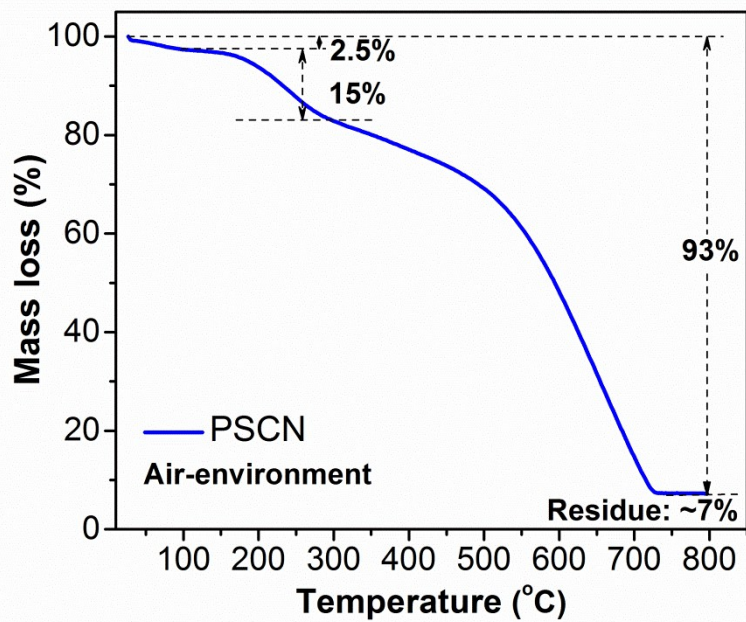

Fig. S2 TGA profile of synthesized PSCN in air.

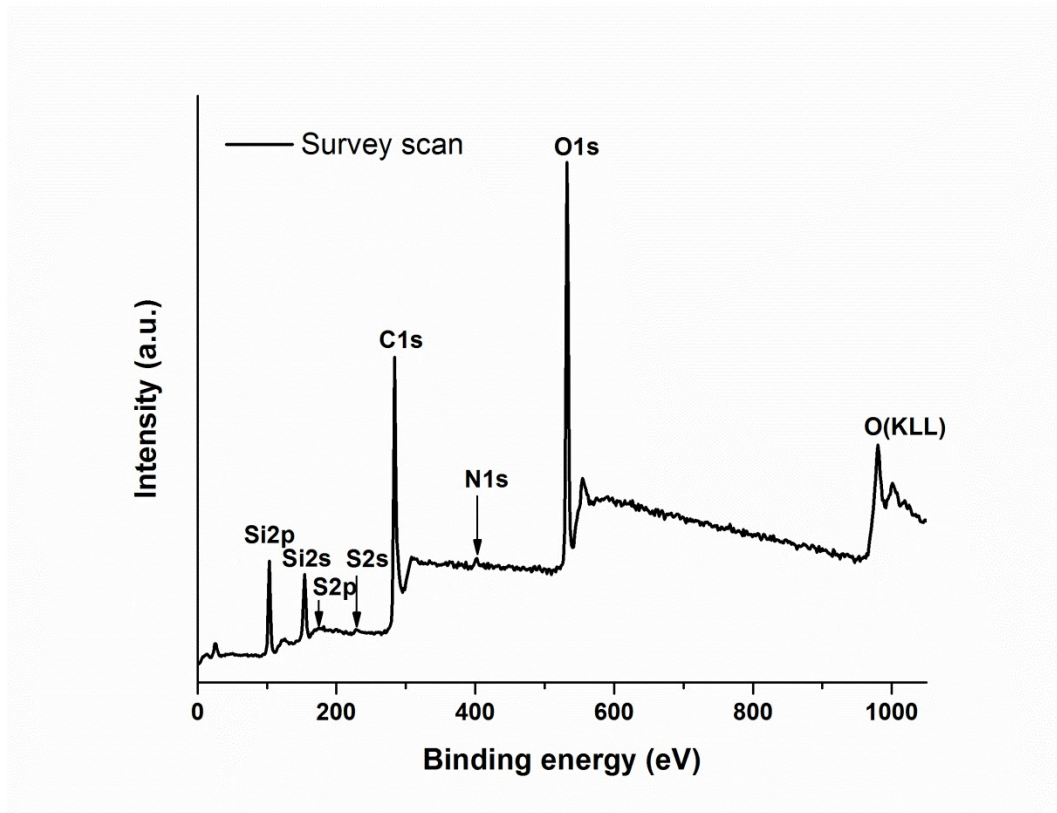

Fig. S3 XPS survey spectrum of PSCN.

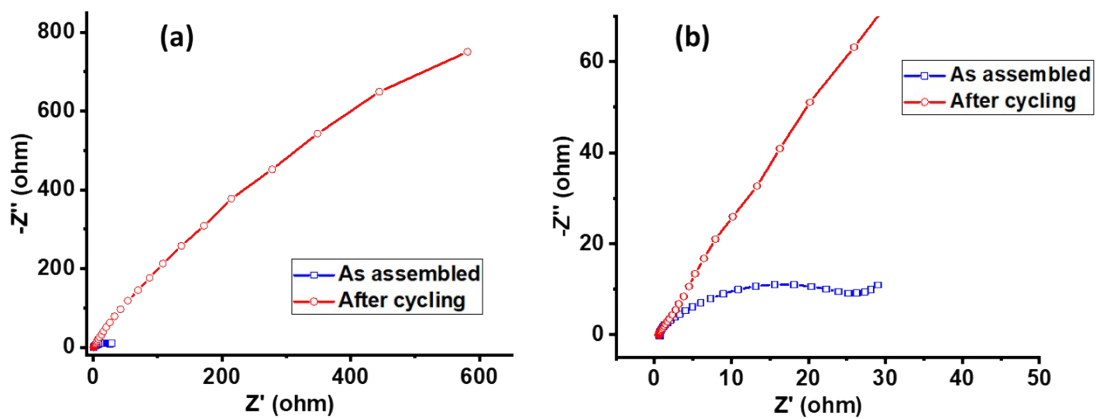

Fig. S4 Nyquist plots for PSCN in three-electrode configuration (a) for as assembled cell and after 10,000 cycling performance, and (b) magnified plot in the particular region.
